# Supplementary material
Source: PubMed Central journal article supplement (PMC2268597)

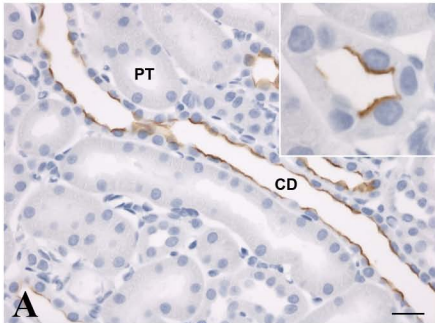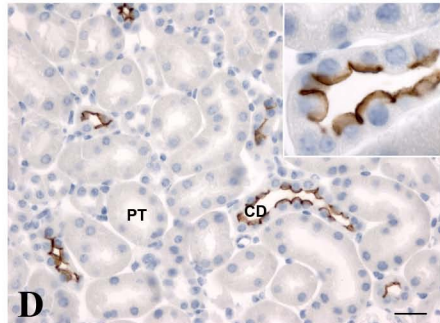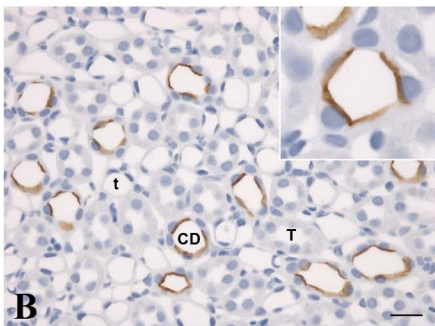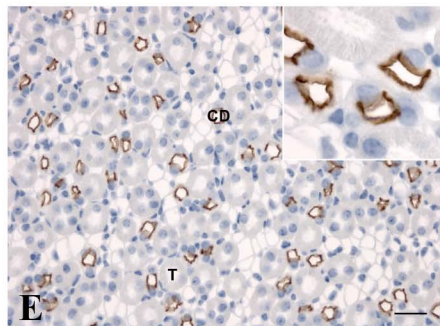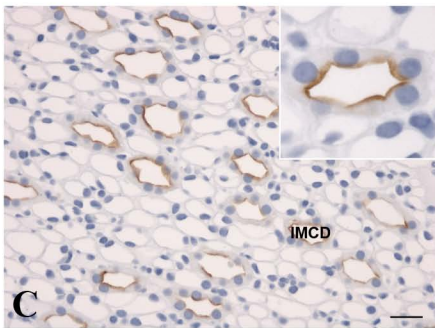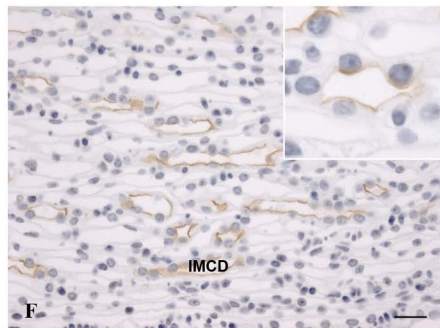

Supplement: pnas_0712338105_1.pdf [file pnas_0712338105_1.pdf]

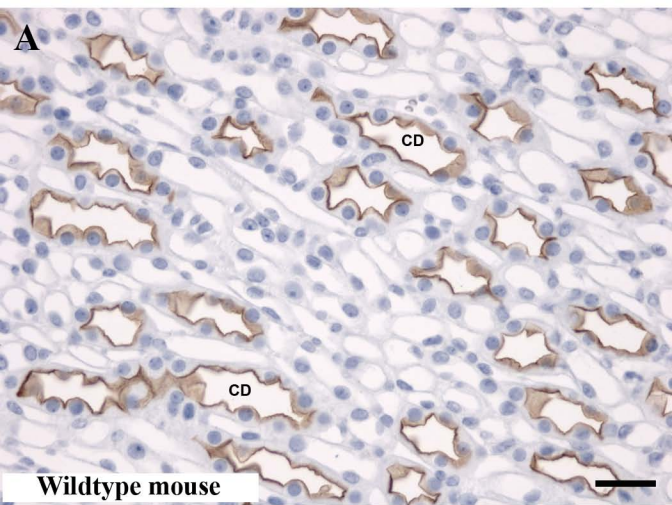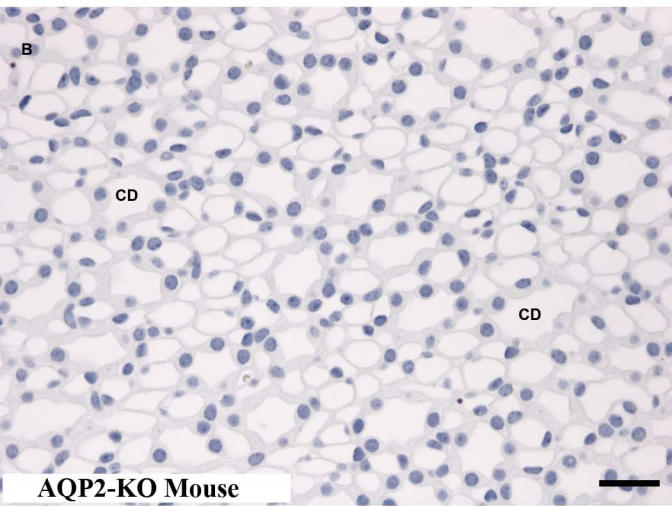

Supplement: pnas_0712338105_2.pdf [file pnas_0712338105_2.pdf]

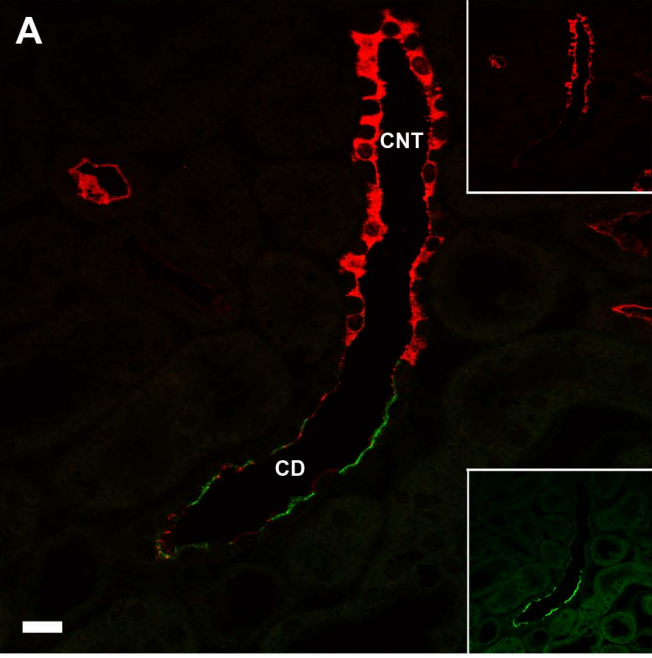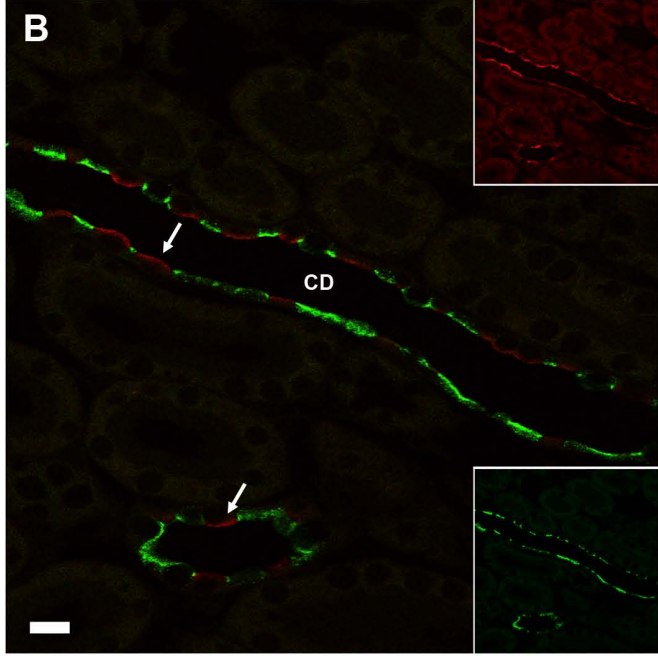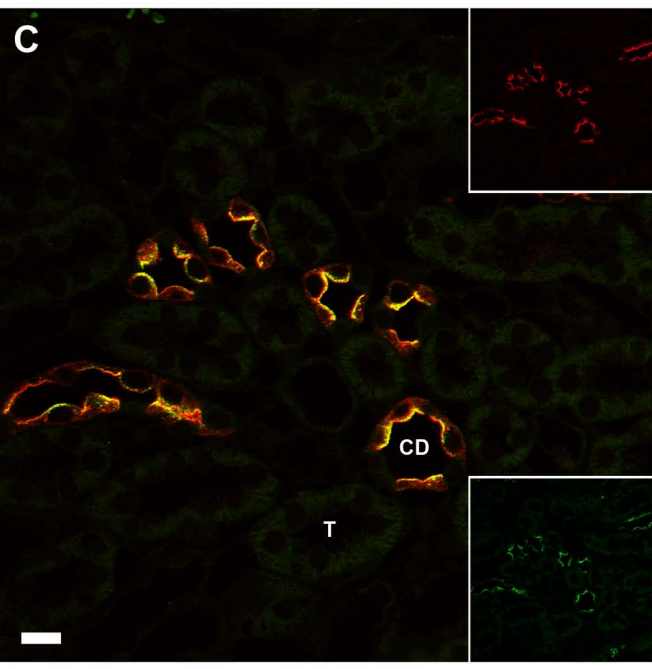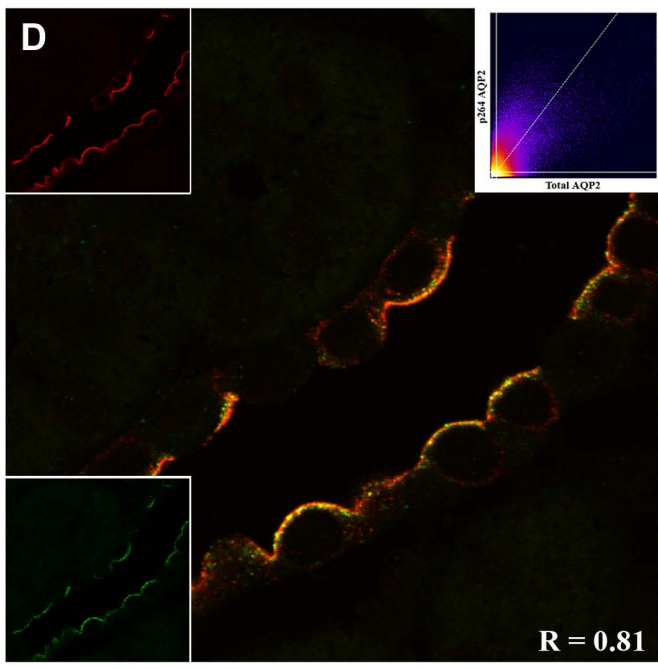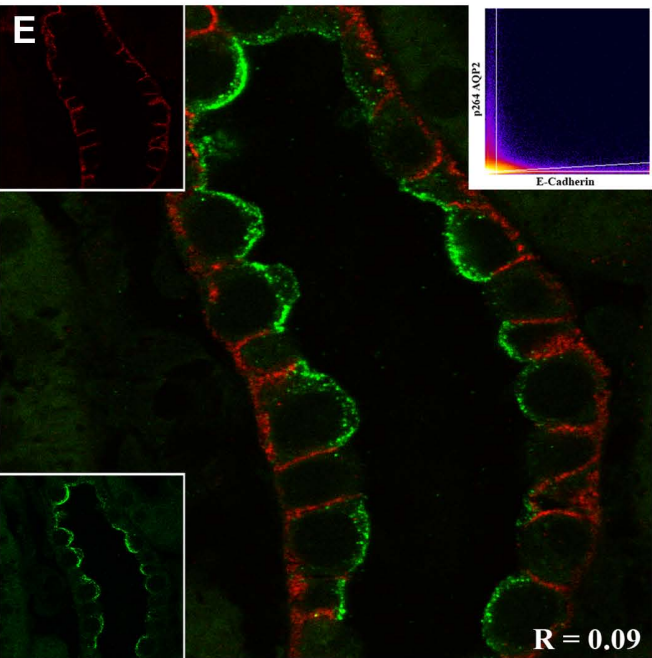

Supplement: pnas_0712338105_3.pdf [file pnas_0712338105_3.pdf]

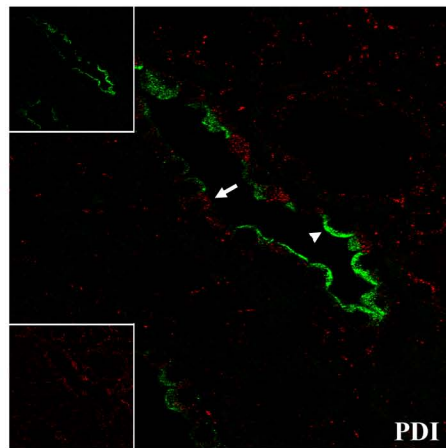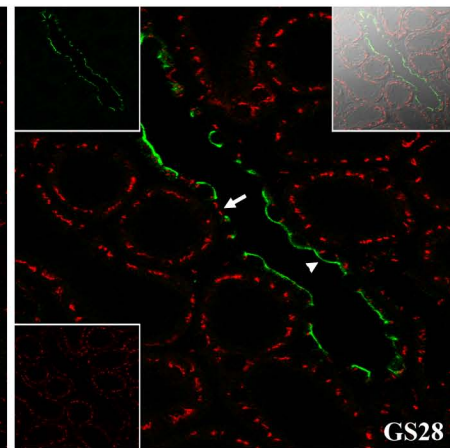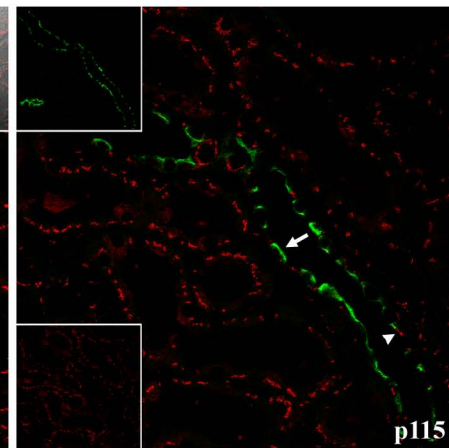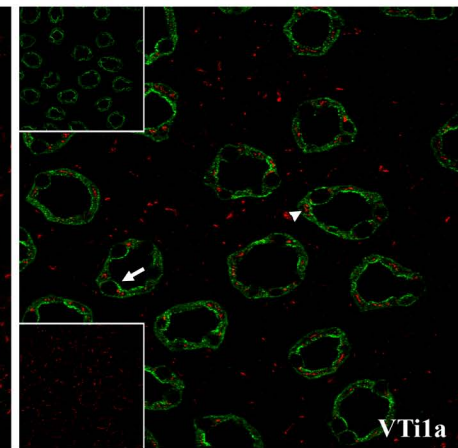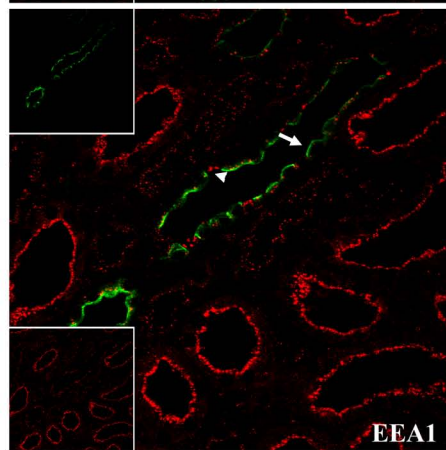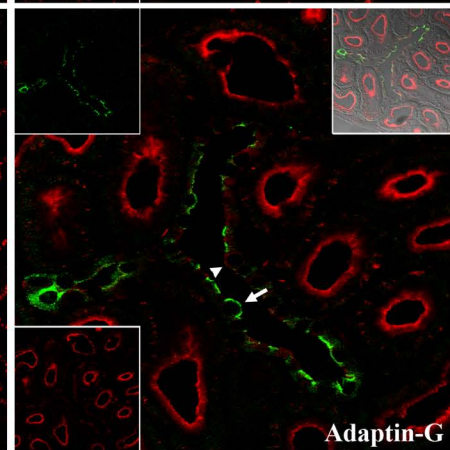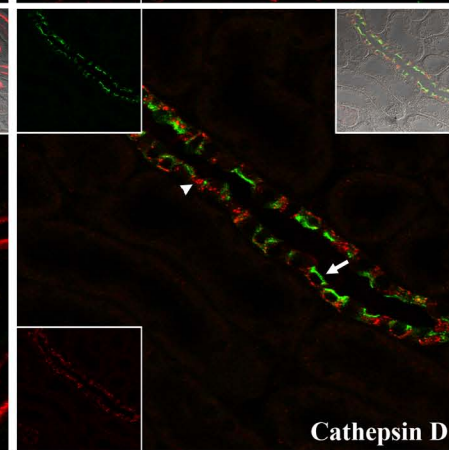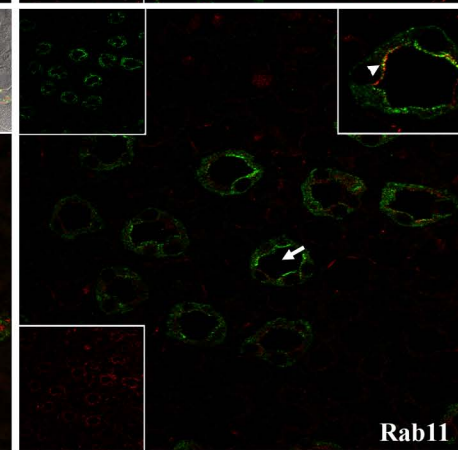

Supplement: pnas_0712338105_4.pdf [file pnas_0712338105_4.pdf]

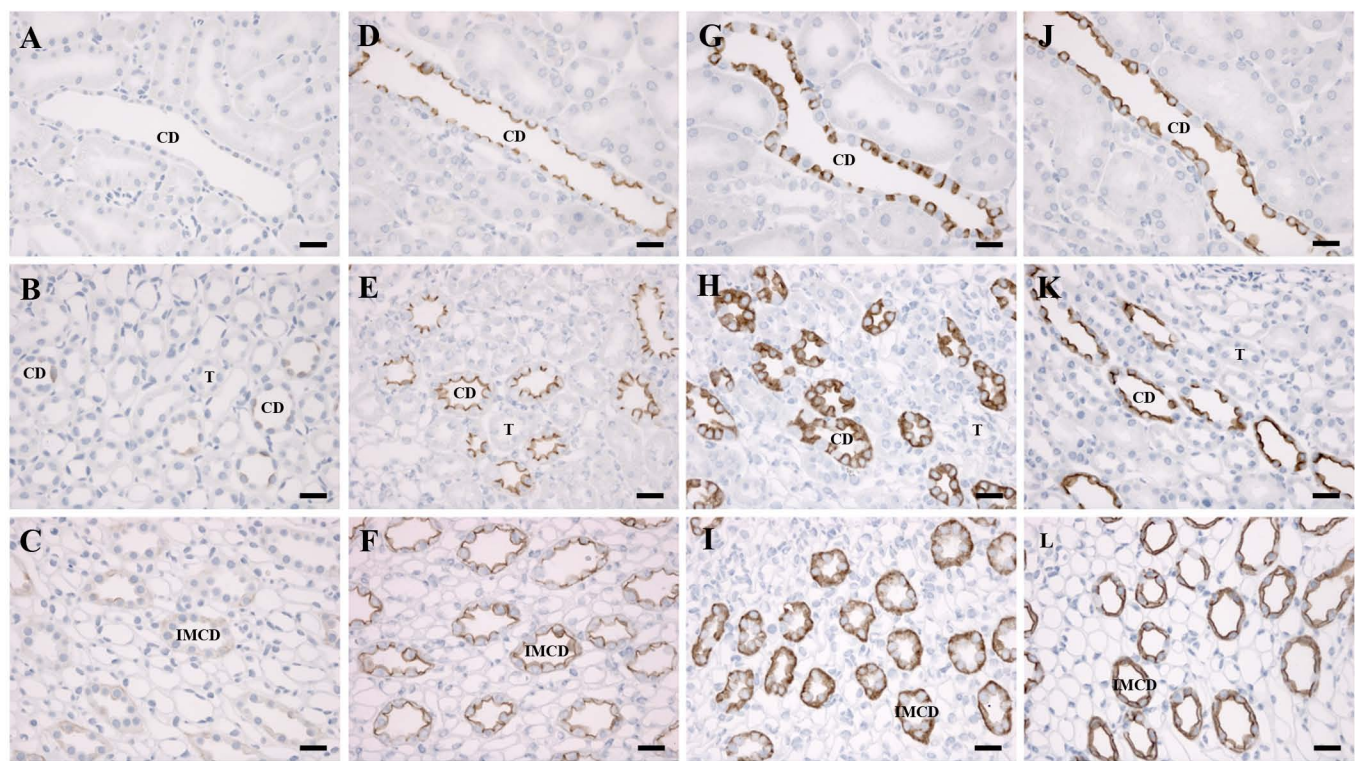

Supplement: pnas_0712338105_5.pdf [file pnas_0712338105_5.pdf]

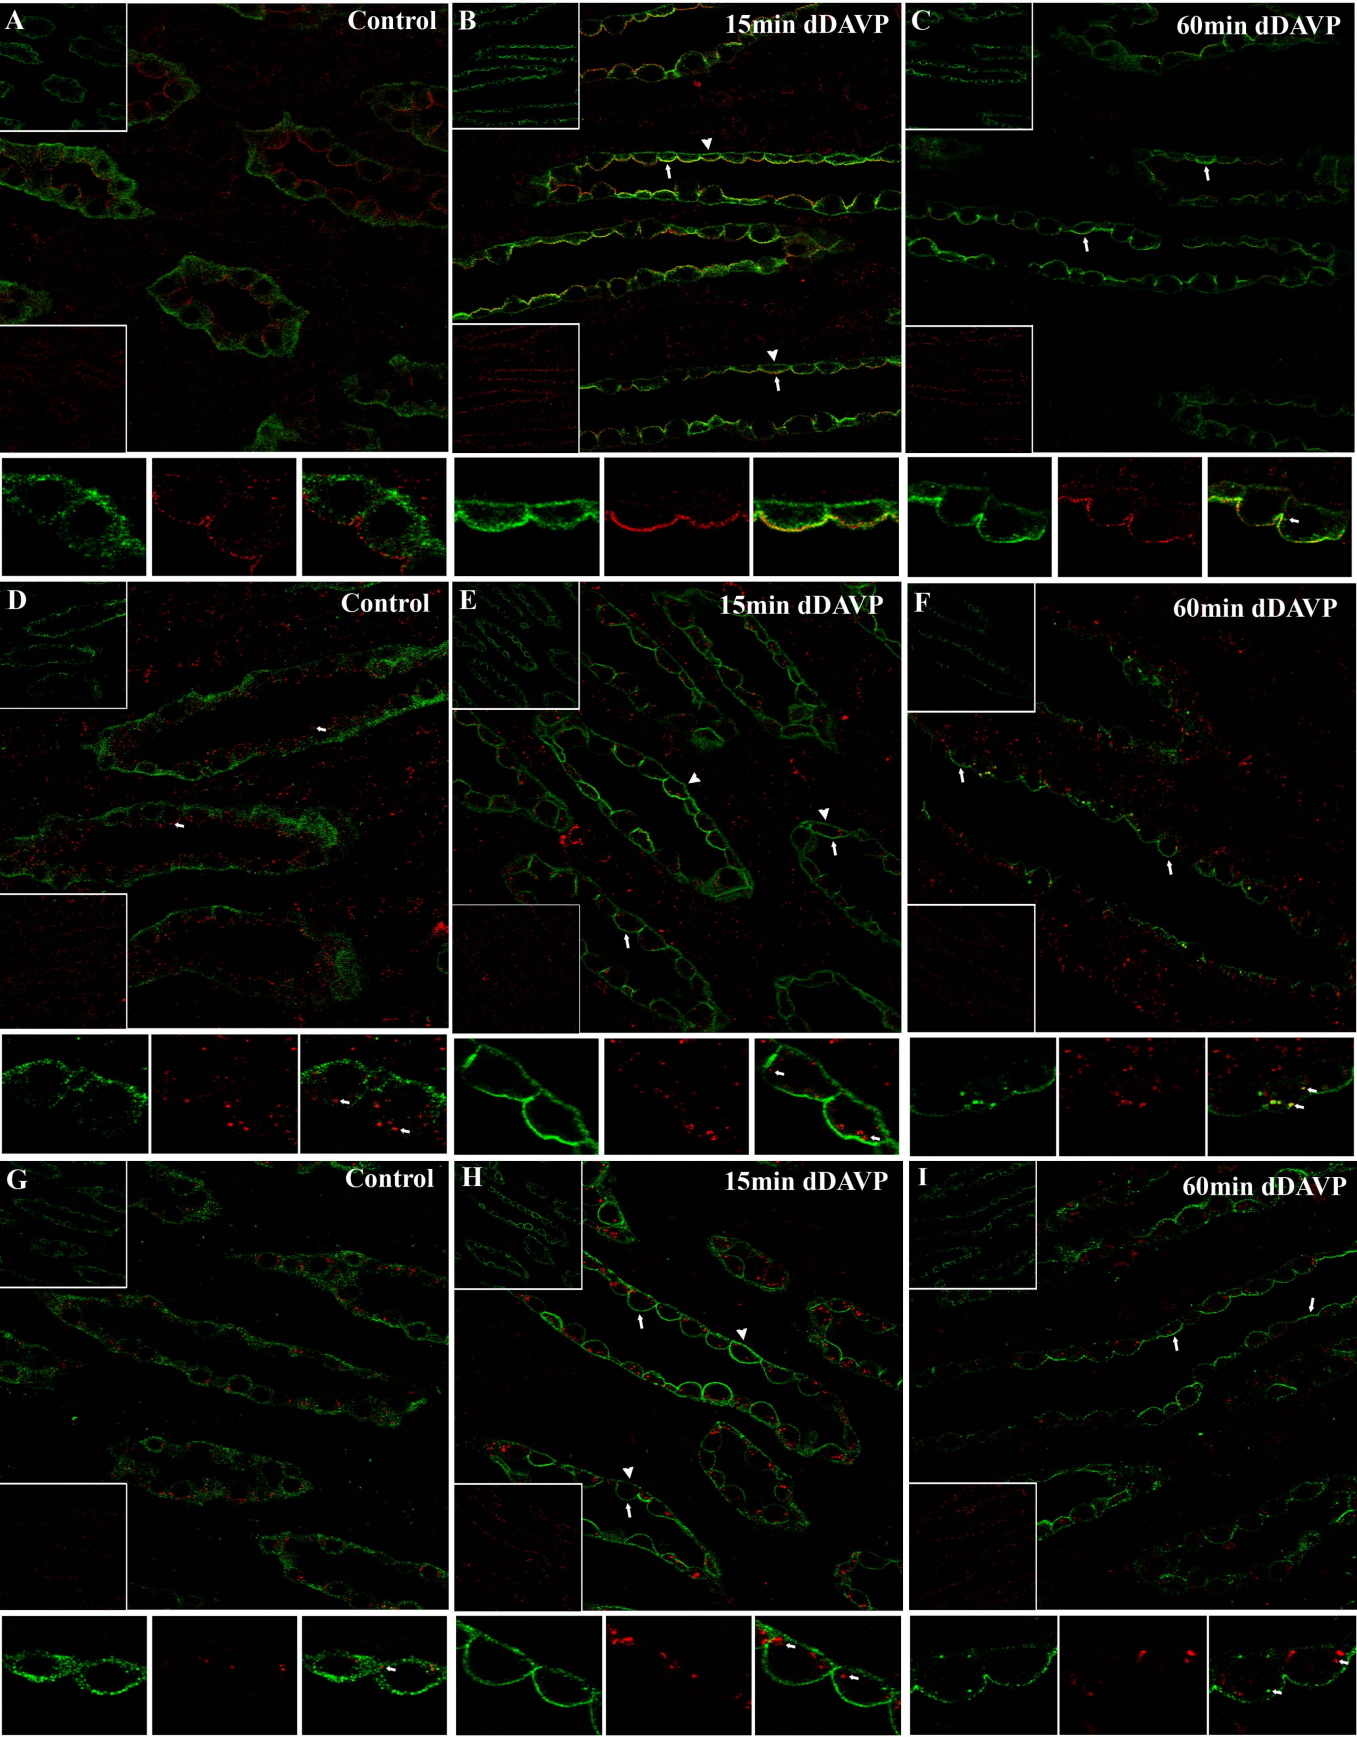

Supplement: pnas_0712338105_6.pdf [file pnas_0712338105_6.pdf]
